# Supplementary material
Source: Springer Nature journal article supplement (https://www.springermedizin.de/resource/supplementary/12916_2008_156_MOESM4_ESM.pdf/9599284)

Week 2005/40

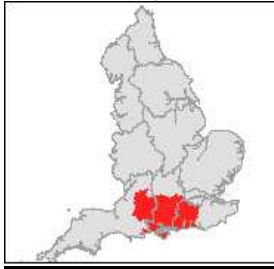

Week 2005/41-45

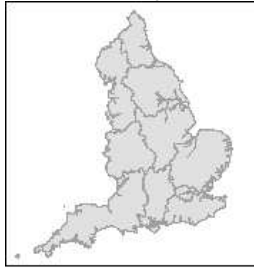

Week 2005/46

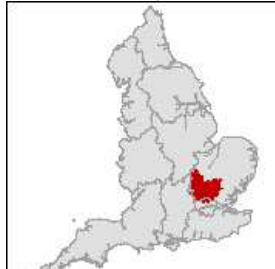

Week 2005/47-48

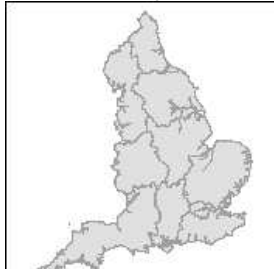

Week 2005/49

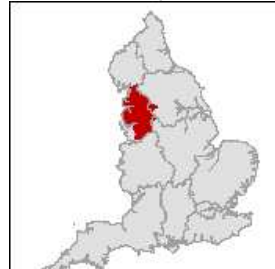

Week 2005/50

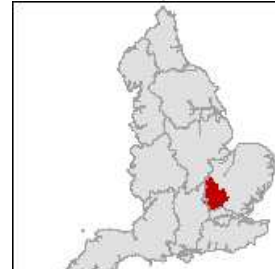

Week 2005/51

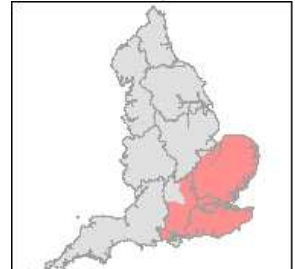

Week 2006/52

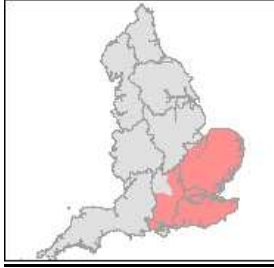

Week 2006/01

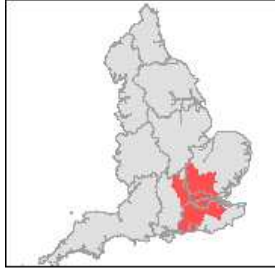

Week 2006/02

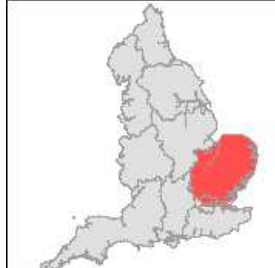

Week 2006/03

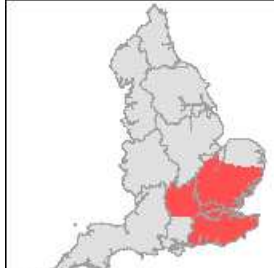

Week 2006/04

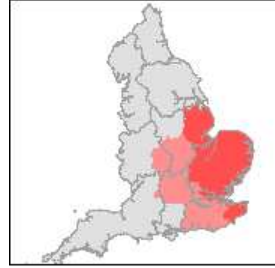

Week 2006/05

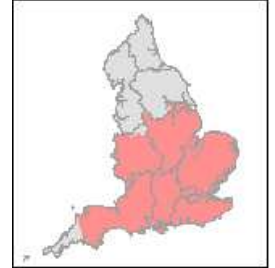

Week 2006/06

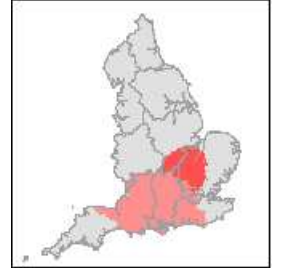

Week 2006/07

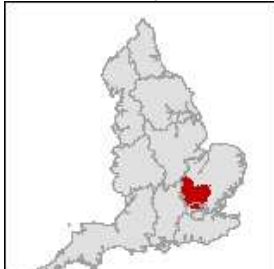

Week 2006/8

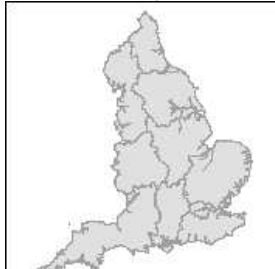

Week 2006/9

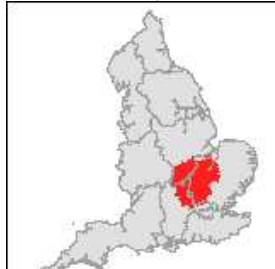

Week 2006/10

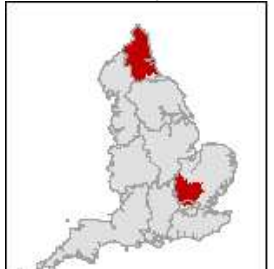

Week 2006/11

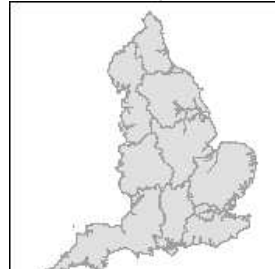

Week 2006/12

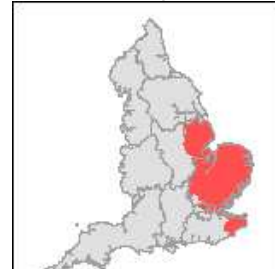

Legend

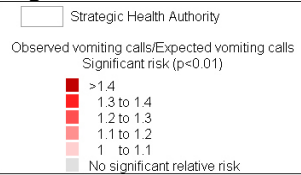

Supplement: MOESM4 [file 9599284]
